# Supplementary material for: Cinnamomum sp. and Pelargonium odoratissimum as the Main Contributors to the Antibacterial Activity of the Medicinal Drink Horchata: A Study Based on the Antibacterial and Chemical Analysis of 21 Plants
Source: MDPI journal article supplement (doi:10.3390/molecules28020693), 2023-01-10
Supplement: s1 [file s1]

## Supplementary Materials

Supplementary Table S1. Biofilm inhibition of bacterial strains of clinical importance by plant extracts used in the herbal infusion horchata.

| Plant scientific name            | Bacterial strains | Type             | MIC   | Biofilm formation (% $\pm$ SD) | <i>p</i> -values          | MIC   | Biofilm formation (% $\pm$ SD) | <i>p</i> -values          |
|----------------------------------|-------------------|------------------|-------|--------------------------------|---------------------------|-------|--------------------------------|---------------------------|
| <i>Cinnamomum</i> sp.            | <i>S. aureus</i>  | Methanol Control | 1xMIC | 79.5 $\pm$ 2.6                 | <b>0.002</b> <sup>a</sup> | 2xMIC | 80.0 $\pm$ 2.8                 | <b>0.002</b> <sup>a</sup> |
|                                  |                   | Sample           | 1xMIC | 91.9 $\pm$ 7.2                 | <b>0.023</b> <sup>b</sup> | 2xMIC | 96.2 $\pm$ 7.8                 | <b>0.018</b> <sup>b</sup> |
|                                  | MRSA 333          | Methanol Control | 1xMIC | 75.2 $\pm$ 1.5                 | <b>0.003</b> <sup>a</sup> | 2xMIC | 80.5 $\pm$ 7.0                 | <b>0.002</b> <sup>a</sup> |
|                                  |                   | Sample           | 1xMIC | 80.7 $\pm$ 3.4                 | 0.088 <sup>b</sup>        | 2xMIC | 85.3 $\pm$ 3.5                 | 0.130 <sup>b</sup>        |
| <i>Pelargonium odoratissimum</i> | <i>S. aureus</i>  | Methanol Control | 1xMIC | 83.7 $\pm$ 9.8                 | <b>0.024</b> <sup>a</sup> | 2xMIC | 77.2 $\pm$ 3.2                 | <b>0.002</b> <sup>a</sup> |
|                                  |                   | Sample           | 1xMIC | 92.1 $\pm$ 12.1                | 0.219 <sup>b</sup>        | 2xMIC | 96.8 $\pm$ 21.7                | <b>0.018</b> <sup>b</sup> |

MIC: Minimum inhibitory concentration. SD: Standard deviation. Biofilm formation values of methanol/water controls and samples were calculated as the percentage of pathogen biofilm formation through the optical density comparison between methanol controls/samples and pathogen growth in only medium culture (positive control). The experimental positive controls were considered as 100 % when compared to methanol control and samples in the assays. Statistical analyses (*p*-values) were performed using a non-parametric Mann-Whitney test (95% confidence interval) for comparison between biofilm formation values. <sup>a</sup> *p*-values obtained when comparing positive controls and methanol controls. <sup>b</sup> *p*-values obtained when comparing methanol controls and samples. Bold *p*-values illustrated statistically significant values below 0.05.

Supplementary Table S2. Biofilm eradication of bacterial strains of clinical importance by plant extracts used in the herbal infusion horchata.

| Plant scientific name                   | Bacterial strains | Type             | MIC   | Biofilm formation (% $\pm$ SD) | <i>p</i> -values          | MIC   | Biofilm formation (% $\pm$ SD) | <i>p</i> -values          |
|-----------------------------------------|-------------------|------------------|-------|--------------------------------|---------------------------|-------|--------------------------------|---------------------------|
| <b><i>Cinnamomum</i> sp.</b>            | <i>S. aureus</i>  | Methanol Control | 1xMIC | 79.2 $\pm$ 7.5                 | <b>0.013</b> <sup>a</sup> | 2xMIC | 86.0 $\pm$ 10.8                | 0.068 <sup>a</sup>        |
|                                         |                   | Sample           | 1xMIC | 96.6 $\pm$ 19.9                | 0.109 <sup>b</sup>        | 2xMIC | 98.3 $\pm$ 11.7                | 0.163 <sup>b</sup>        |
|                                         | MRSA 333          | Methanol Control | 1xMIC | 86.4 $\pm$ 17.2                | 0.092 <sup>a</sup>        | 2xMIC | 74.5 $\pm$ 9.3                 | <b>0.002</b> <sup>a</sup> |
|                                         |                   | Sample           | 1xMIC | 95.9 $\pm$ 9.9                 | 0.454 <sup>b</sup>        | 2xMIC | 100.8 $\pm$ 19.2               | <b>0.038</b> <sup>b</sup> |
| <b><i>Pelargonium odoratissimum</i></b> | <i>S. aureus</i>  | Methanol Control | 1xMIC | 80.9 $\pm$ 10.8                | <b>0.023</b> <sup>a</sup> | 2xMIC | 87.7 $\pm$ 7.4                 | 0.109 <sup>a</sup>        |
|                                         |                   | Sample           | 1xMIC | 100 $\pm$ 23.9                 | 0.283 <sup>b</sup>        | 2xMIC | 100.0 $\pm$ 24.5               | 0.334 <sup>b</sup>        |

MIC: Minimum inhibitory concentration. SD: Standard deviation. Biofilm formation values of methanol/water controls and samples were calculated as the percentage of pathogen biofilm formation through the optical density comparison between methanol controls/samples and pathogen growth media culture only (positive control). The experimental positive controls were considered as 100 % when compared to methanol control and samples in the assays. Statistical analyses (*p*-values) were performed using a non-parametric Mann-Whitney test (95% confidence interval) for comparison between biofilm formation values. <sup>a</sup> *p*-values obtained when comparing positive controls and methanol controls. <sup>b</sup> *p*-values obtained when comparing methanol controls and samples. Bold *p*-values illustrated statistically significant values below 0.05.
